# Supplementary material for: Reactive oxygen species prevent lysosome coalescence during PIKfyve inhibition
Source: PubMed Central journal article supplement (PMC8610251; doi:10.1371/journal.pone.0259313), 2021-11-23

# Western Blot Images

## Cytosolic Materials

- 1) Apilimod
- 2) Apilimod+Rotenone
- 3) Apilimod+H<sub>2</sub>O<sub>2</sub>
- 4) Vehicle
- 5) Rotenone
- 6) H<sub>2</sub>O<sub>2</sub>

1 2 3 4 5 6

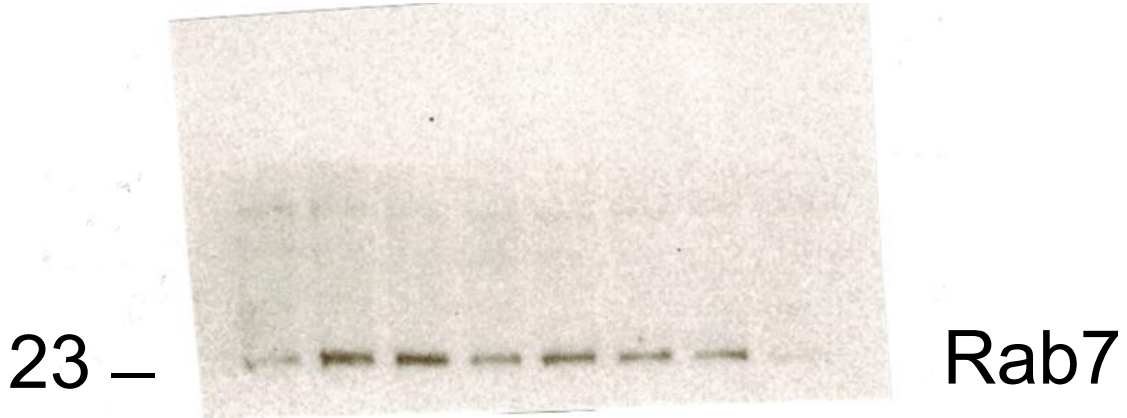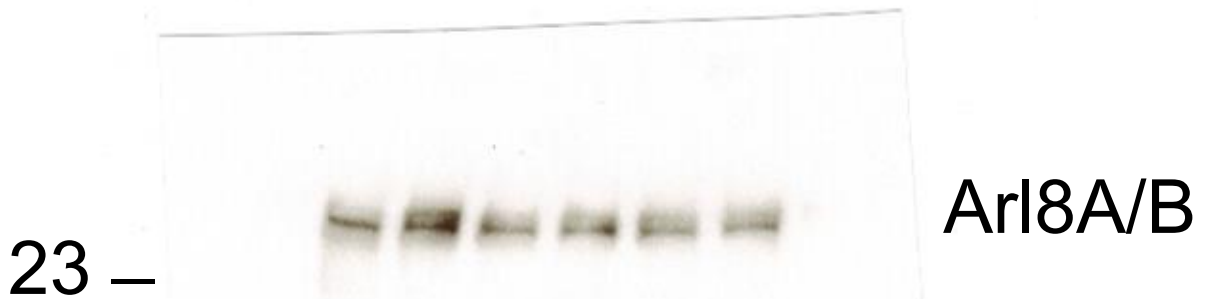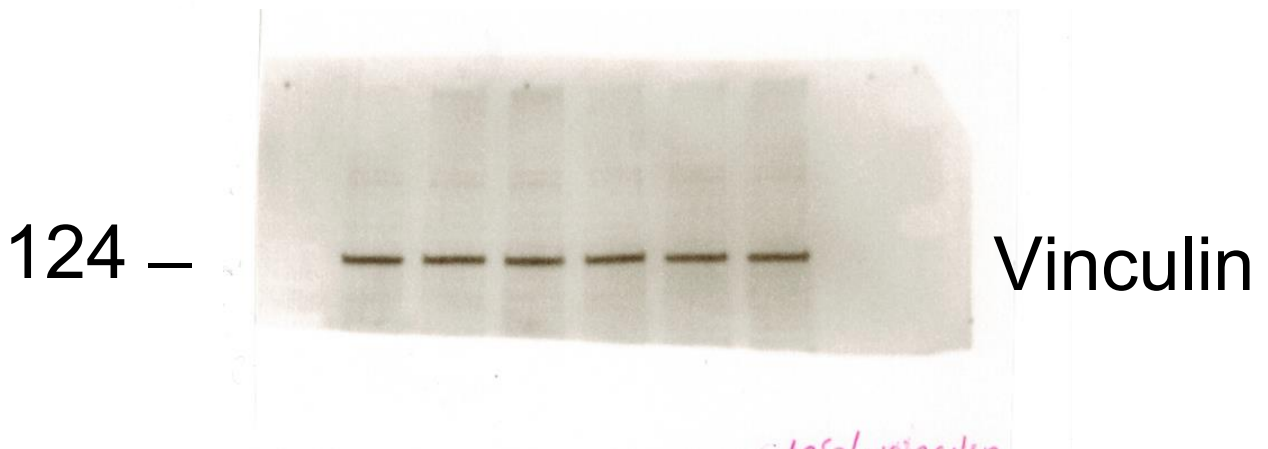

# Western Blot Images

## Membrane Materials

- 1) Apilimod
- 2) Apilimod+Rotenone
- 3) Apilimod+H<sub>2</sub>O<sub>2</sub>
- 4) Vehicle
- 5) Rotenone
- 6) H<sub>2</sub>O<sub>2</sub>

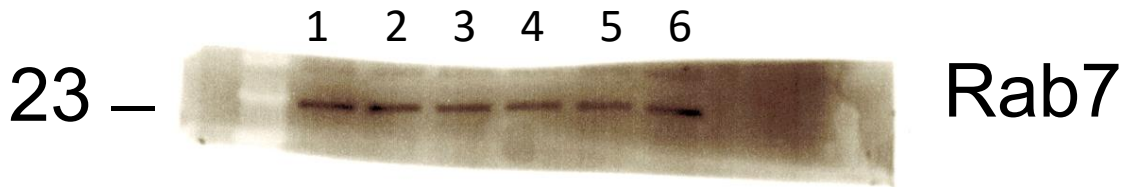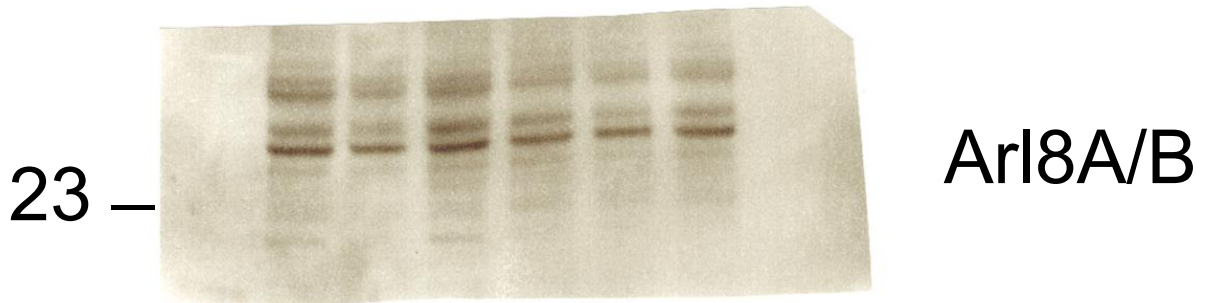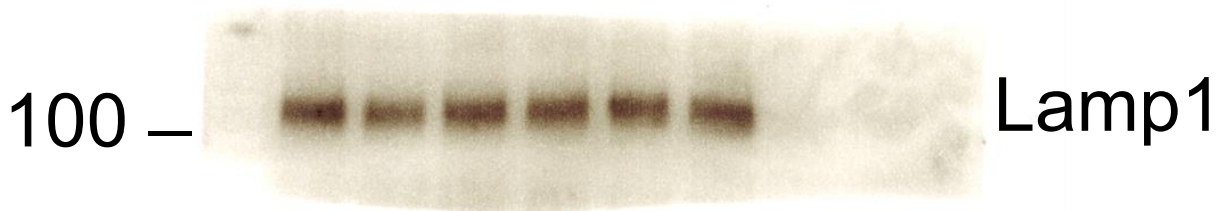

# Lysosome fractionation western blot

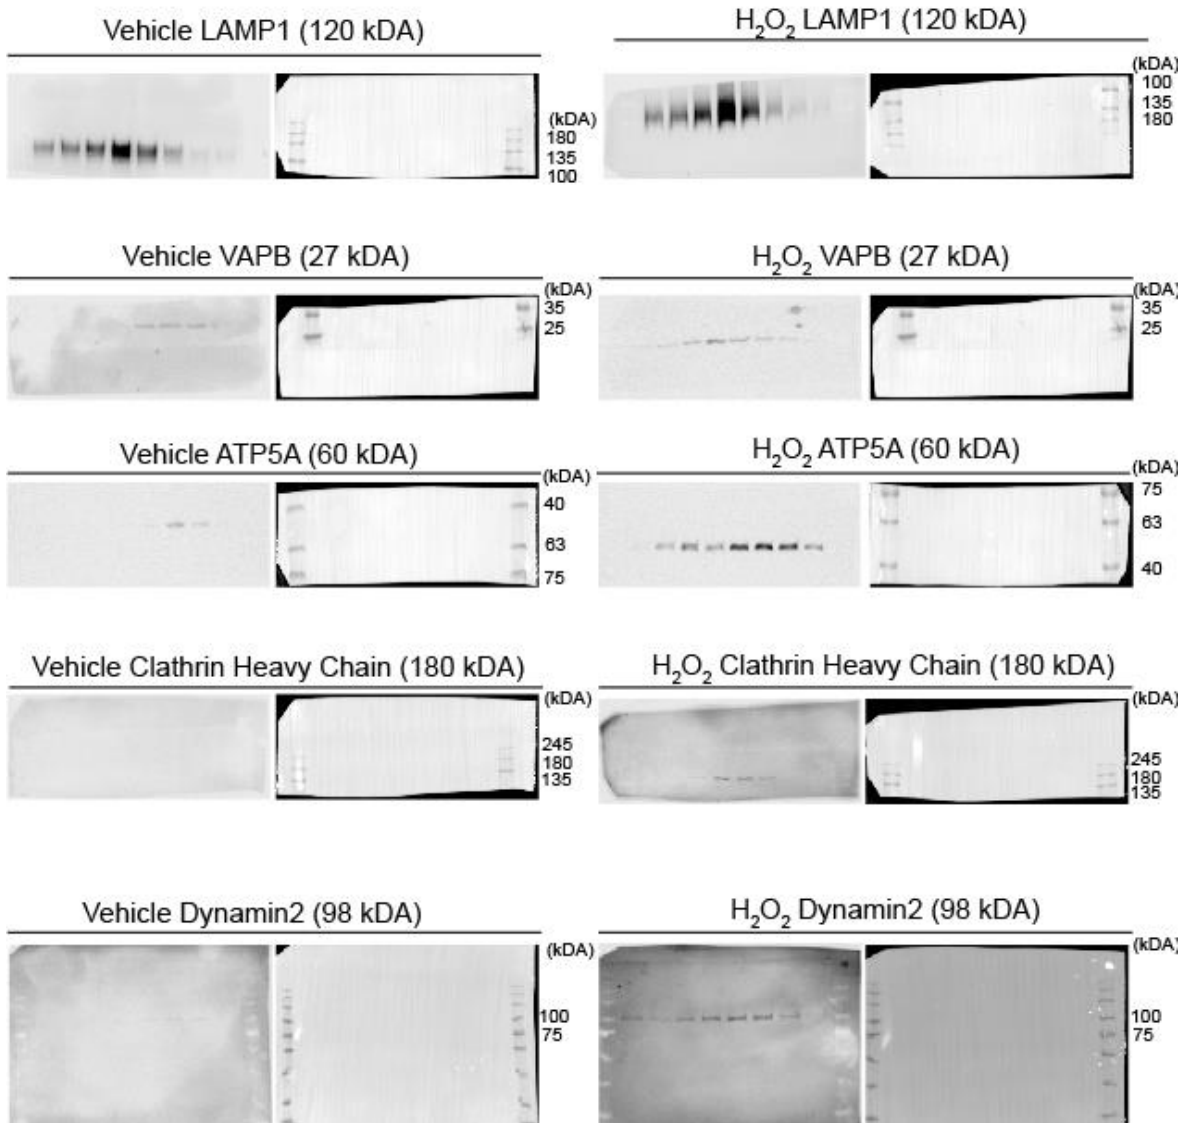

Supplement: pone.0259313.s009.pdf [file pone.0259313.s009.pdf]
